# Supplementary material
Source: PubMed Central journal article supplement (PMC7785011)
Supplement: 41422_2020_357_MOESM2_ESM.pdf [file 41422_2020_357_MOESM2_ESM.pdf]

## Supplementary information, Fig. S2

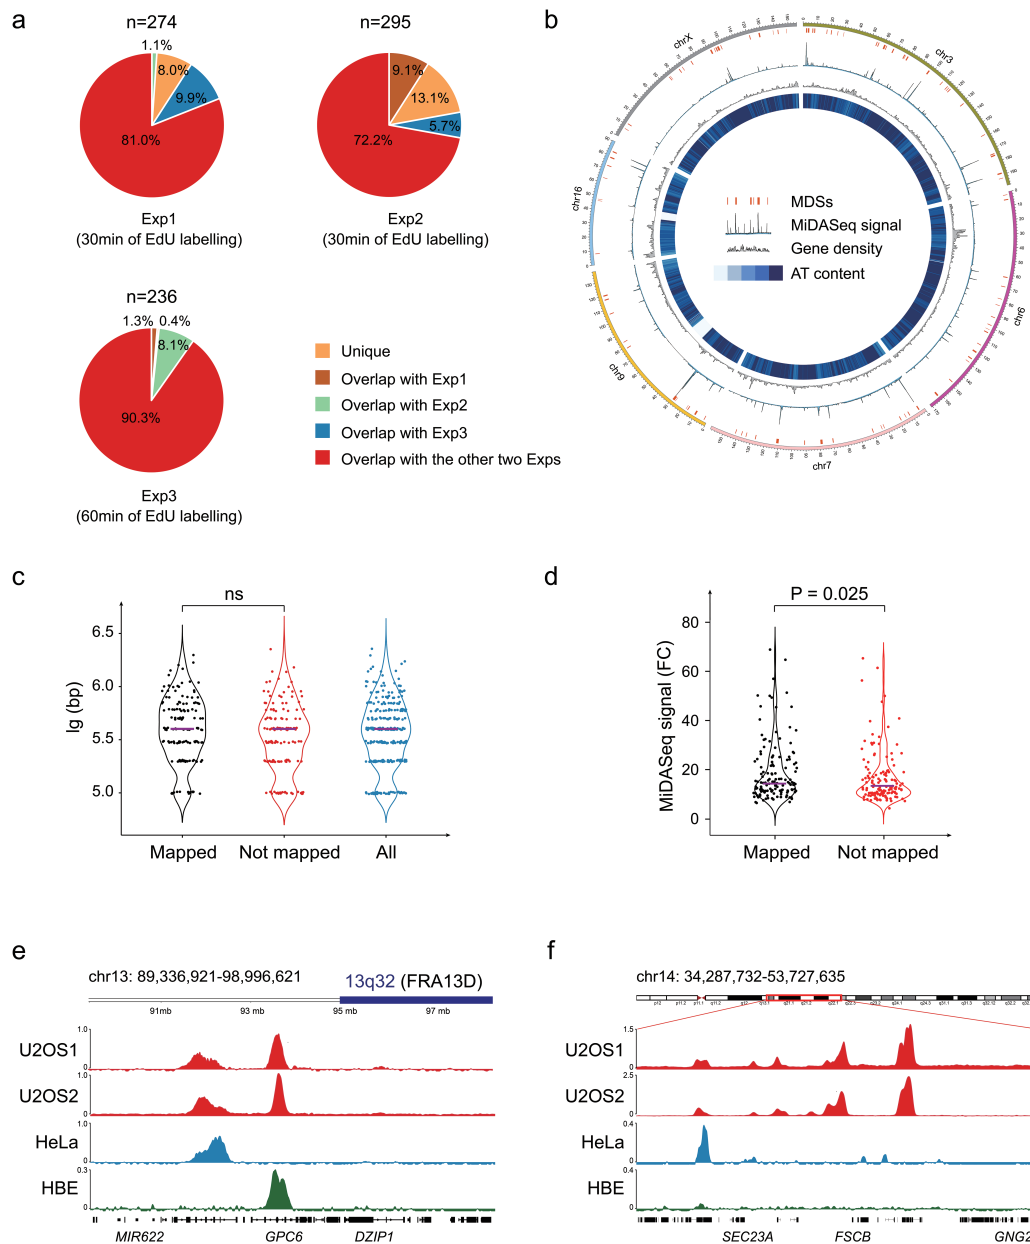

## Supplementary information, Fig. S2

**a** Overlap between mitotic DNA synthesis sites (MDSs) identified in 3 independent experiments with varying EdU labelling time. **b** Circos plot showing MDSs, MiDASeq signal, gene density and AT content on individual chromosomes including chromosome 3, chromosome 6, chromosome 7, chromosome 9, chromosome 16, and chromosome X. Darker blue denotes

higher AT content. **c** Violin plot showing the size distribution of all MDSs and MDSs mapped or not mapped to known CFSs. P value was determined using a Wilcoxon rank-sum test. The solid purple line indicates the median value. **d** MiDASeq signal of MDSs mapped or not mapped to known CFSs. P value was determined using a Wilcoxon rank-sum test. **e, f** Representative genomic views of MDSs in different cell lines located to 13q32 (FRA13D) or an unreported loci on chromosome 14 (q13.1-q 22.1). The dark blue bar at the top of each view indicates CFS location previously defined at the cytogenetic level. Red, light blue, and green peaks represent MDSs identified in U2OS, HeLa, and HBE cells, respectively.
