# Supplementary material
Source: PubMed Central journal article supplement (PMC7785011)
Supplement: 41422_2020_357_MOESM3_ESM.pdf [file 41422_2020_357_MOESM3_ESM.pdf]

## Supplementary information, Fig. S3

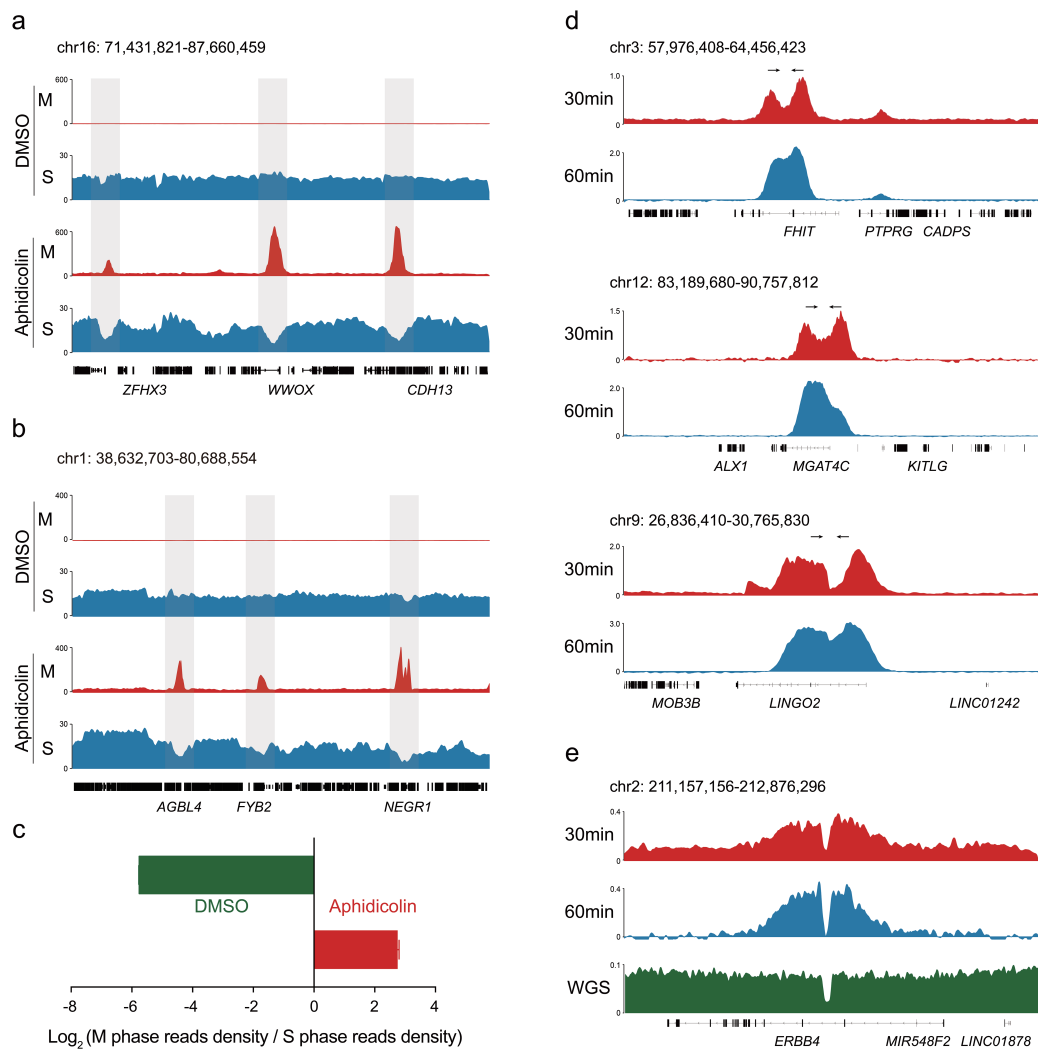

## Supplementary information, Fig. S3

**a, b** Two representative genomic views of the reads density (reads per 50 kb genomic bin per million sequenced reads) calculated using nascent DNA sequencing data from S phase cells or M phase cells treated with or without 0.3  $\mu$ M Aphidicolin. **c** Quantification of dependence of MDSs on MiDAS versus S phase DNA synthesis in the absence or presence of Aphidicolin. **d** Representative genomic views of convergence of two MiDAS peaks along with time after release into mitosis. **e** Representative genomic view of two MiDAS peaks flanking a deletion site indicated by whole genome sequencing.
