# Supplementary material
Source: PubMed Central journal article supplement (PMC7785011)
Supplement: 41422_2020_357_MOESM4_ESM.pdf [file 41422_2020_357_MOESM4_ESM.pdf]

**Supplementary information, Fig. S4**

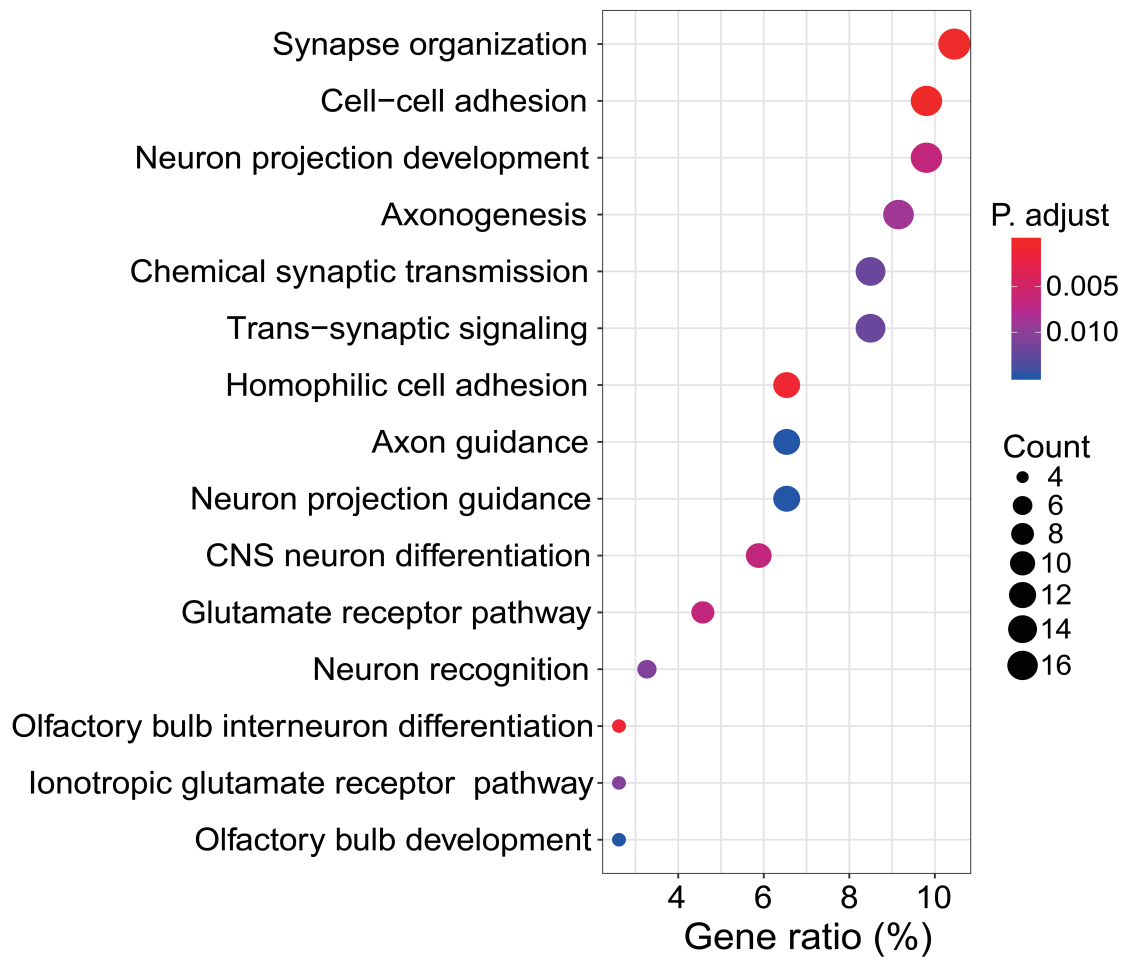

**Supplementary information, Fig. S4**

Gene ontology analysis of genes annotated to MDSs in U2OS cells.
