# Supplementary material
Source: PubMed Central journal article supplement (PMC7785011)
Supplement: 41422_2020_357_MOESM6_ESM.pdf [file 41422_2020_357_MOESM6_ESM.pdf]

## Supplementary information, Fig. S6

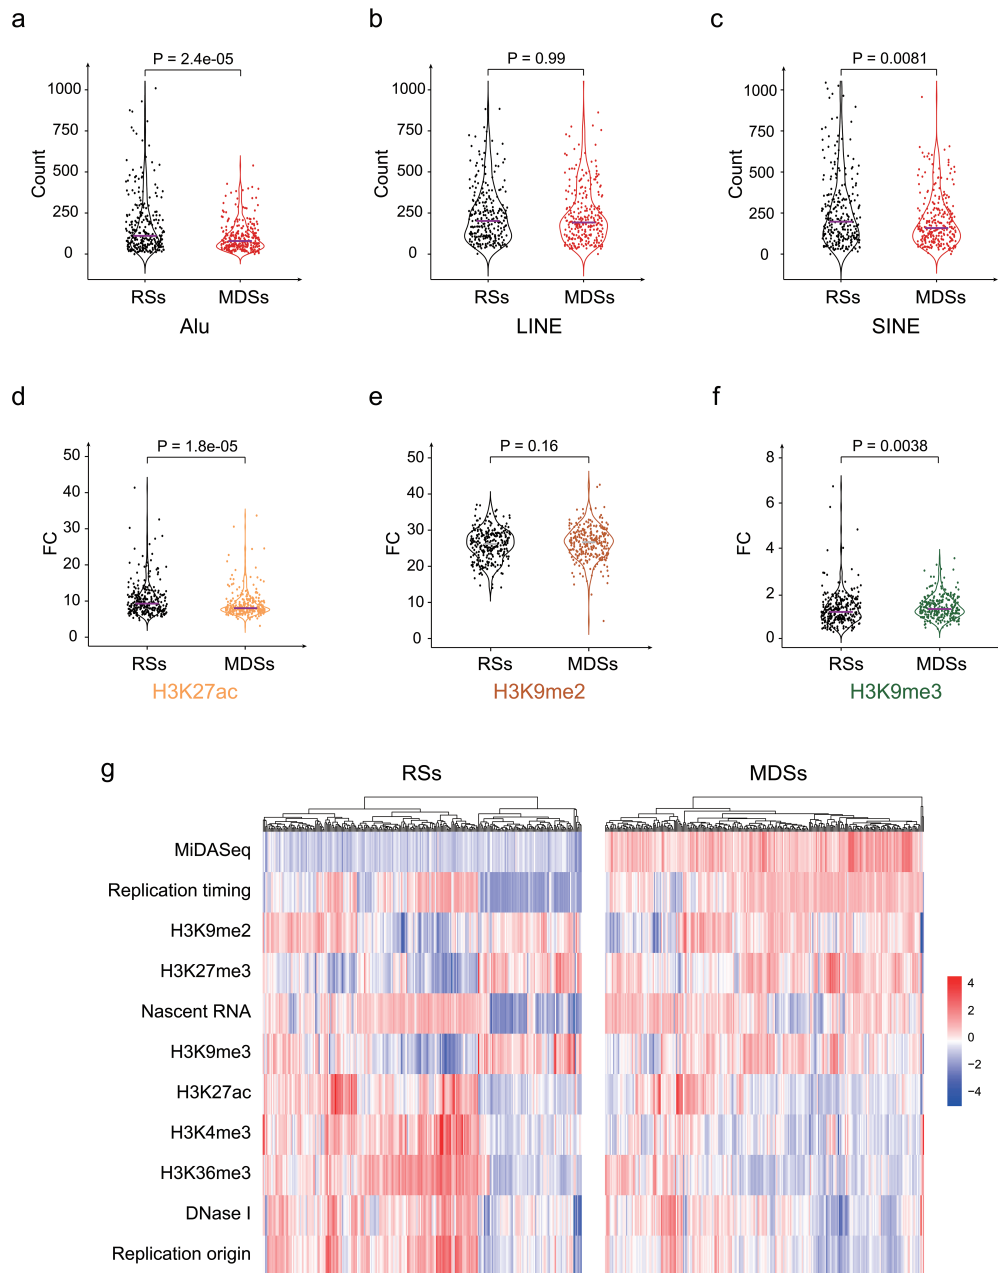

## Supplementary information, Fig. S6

**a-c** Violin plot showing the content of Alu element, long interspersed nuclear elements (LINEs) and short interspersed nuclear elements (SINEs) in RSs and hrCFSs. P value was determined using a Wilcoxon rank-sum test. The solid purple line denotes the median value. **d-f** Violin plots comparing the levels of H3K27ac, H3K9me2, and H3K9me3, respectively. P value was determined by

Wilcoxon rank-sum test. The solid purple line indicates the median value. **g** A general heatmap of MiDAS signal in RSs and MDSs along with other epigenetic markers and genomic features.
