# Supplementary material
Source: PubMed Central journal article supplement (PMC7785011)
Supplement: 41422_2020_357_MOESM8_ESM.pdf [file 41422_2020_357_MOESM8_ESM.pdf]

## Supplementary Table S1 | MDSs identified in U2OS cells

| MDS (U2OS) | Chromosome | Start     | End       | Width   | MidASeq signal (FC) | Replication timing (A.U) | Origin density (RPK) | The closest gene | Gene length (bp) | Nascent RNA (RPKM) | Known CFS         |
|------------|------------|-----------|-----------|---------|---------------------|--------------------------|----------------------|------------------|------------------|--------------------|-------------------|
| 172        | chr10      | 82000000  | 82800000  | 800000  | 68.857              | 2.881                    | 10.778               | DYDC1            | 20654            | 0.24               | FRA10D            |
| 53         | chr3       | 96900000  | 97700000  | 800000  | 65.311              | 2.996                    | 10.615               | CRYBG3           | 122947           | 0.077              | NA                |
| 66         | chr4       | 19000000  | 19700000  | 700000  | 64.724              | 2.465                    | 5.923                | SLIT2            | 365554           | 0.541              | FRA4D             |
| 210        | chr14      | 26900000  | 27800000  | 900000  | 61.408              | 2.756                    | 7.469                | MIR4307          | 84               | 0.683              | NA                |
| 21         | chr2       | 136900000 | 137500000 | 600000  | 56.974              | 2.786                    | 10.998               | THSD7B           | 898031           | 0.121              | FRA2F and FRA2S   |
| 218        | chr14      | 46400000  | 47900000  | 1500000 | 56.287              | 2.821                    | 13.936               | LINC00871        | 437743           | 0.467              | NA                |
| 164        | chr10      | 51100000  | 52100000  | 1000000 | 51.318              | 1.997                    | 12.993               | TIMM23           | 31306            | 0.167              | FRA10C and FRA10G |
| 234        | chr16      | 78400000  | 79100000  | 700000  | 50.178              | 2.056                    | 22.606               | WWOX             | 1113238          | 0.326              | FRA16D            |
| 235        | chr16      | 82900000  | 83500000  | 600000  | 50.03               | 2.595                    | 19.39                | MIR3182          | 63               | 0.017              | FRA16D            |
| 195        | chr12      | 23800000  | 24300000  | 500000  | 49.992              | 2.33                     | 8.96                 | SOX5             | 417407           | 0.334              | NA                |
| 25         | chr2       | 140700000 | 140900000 | 200000  | 49.333              | 3.32                     | 5.405                | YY1P2            | 1851             | 0.002              | FRA2S             |
| 37         | chr3       | 2200000   | 2900000   | 700000  | 47.633              | 2.887                    | 10.19                | CNTN4            | 819133           | 0.145              | NA                |
| 72         | chr4       | 61300000  | 61900000  | 600000  | 45.765              | 2.034                    | 10.147               | ADGRL3           | 532299           | 0.454              | FRA4B             |
| 157        | chr9       | 27900000  | 29400000  | 1500000 | 45.583              | 2.707                    | 12.678               | MIR876           | 81               | 0.307              | FRA9C             |
| 33         | chr2       | 204800000 | 205400000 | 600000  | 45.405              | 1.462                    | 10.993               | ICOS             | 21143            | 0.219              | FRA2I             |
| 86         | chr4       | 163700000 | 164100000 | 400000  | 40.841              | 2.689                    | 8.58                 | NAF1             | 40214            | 0.068              | NA                |
| 47         | chr3       | 60000000  | 61000000  | 1000000 | 40.415              | 2.768                    | 12.55                | FHIT             | 1502098          | 0.04               | FRA3B             |
| 60         | chr3       | 173600000 | 174100000 | 500000  | 39.72               | 3.197                    | 5.894                | NLGN1            | 679048           | 0.133              | NA                |
| 248        | chr20      | 14300000  | 15700000  | 1400000 | 37.39               | 2.745                    | 11.959               | MACROD2-AS1      | 45263            | 0.056              | NA                |
| 130        | chr7       | 70000000  | 70500000  | 500000  | 37.255              | 1.358                    | 14.878               | AUTS2            | 26638            | 1.148              | FRA7J             |
| 24         | chr2       | 140300000 | 140400000 | 100000  | 36                  | 2.994                    | 6.23                 | YY1P2            | 1851             | 0.014              | FRA2S             |
| 123        | chr7       | 3400000   | 4100000   | 700000  | 35.307              | 1.229                    | 38.091               | SDK1             | 258034           | 0.767              | FRA7B             |
| 251        | chr21      | 27400000  | 28500000  | 1100000 | 34.365              | 2.012                    | 14.131               | MIR4759          | 83               | 0.693              | NA                |
| 32         | chr2       | 185600000 | 186500000 | 900000  | 34.1                | 0.991                    | 8.811                | FSIP2            | 94662            | 0.481              | FRA2H             |
| 199        | chr12      | 99000000  | 100100000 | 1100000 | 33.342              | 1.605                    | 7.781                | IKBIP            | 31648            | 0.082              | NA                |
| 62         | chr3       | 188500000 | 189300000 | 800000  | 32.673              | 0.554                    | 14.276               | TPRG1-AS2        | 1909             | 0.518              | FRA3C             |
| 198        | chr12      | 86300000  | 87400000  | 1100000 | 32.432              | 2.969                    | 5.129                | MIR548AL         | 78               | 0.41               | FRA12B            |
| 181        | chr11      | 31100000  | 31600000  | 500000  | 32.152              | 2.494                    | 9.442                | NA               | 228417           | 0.447              | FRA11E            |
| 268        | chrX       | 96900000  | 98000000  | 1100000 | 31.695              | 2.448                    | 7.376                | RPA4             | 1544             | 0.126              | FRAXF             |
| 101        | chr5       | 104300000 | 105200000 | 900000  | 31.536              | 2.591                    | 7.794                | RAB9BP1          | 625              | 0.476              | FRA5F             |
| 209        | chr13      | 107300000 | 107900000 | 600000  | 30.902              | 2.623                    | 7.628                | LINC00443        | 18301            | 0.36               | NA                |
| 200        | chr12      | 102300000 | 102800000 | 500000  | 30.837              | 1.524                    | 10.27                | WASHC3           | 49183            | 0.37               | NA                |
| 208        | chr13      | 93600000  | 94100000  | 500000  | 30.819              | 1.46                     | 6.586                | GPC6             | 1079711          | 0.644              | FRA13D            |
| 216        | chr14      | 43200000  | 44600000  | 1400000 | 30.469              | 2.8                      | 11.267               | FSCB             | 3146             | 0.296              | NA                |
| 267        | chrX       | 95600000  | 96200000  | 600000  | 30.253              | 2.872                    | 6.678                | DIAPH2           | 252689           | 0.121              | FRAXF             |
| 126        | chr7       | 18400000  | 18800000  | 400000  | 30.231              | 1.595                    | 10.155               | HDAC9            | 52757            | 0.763              | NA                |
| 16         | chr2       | 115300000 | 115700000 | 400000  | 29.223              | 2.685                    | 10.455               | DPP10            | 1383147          | 0.221              | FRA2B and FRA2S   |
| 2          | chr1       | 49000000  | 49800000  | 800000  | 28.918              | 3.063                    | 10.531               | BEND5            | 49008            | 0.033              | FRA1B             |
| 118        | chr6       | 120100000 | 121000000 | 900000  | 28.452              | 3.065                    | 8.111                | LOC285762        | 38756            | 0.287              | NA                |
| 4          | chr1       | 71300000  | 72600000  | 1300000 | 27.355              | 2.837                    | 7.551                | ZRANB2-AS1       | 20677            | 0.229              | FRA1C and FRA1L   |
| 146        | chr8       | 99300000  | 99600000  | 300000  | 27.152              | 2.24                     | 7.947                | KCNS2            | 3774             | 1.024              | FRA8B             |
| 166        | chr10      | 55200000  | 56000000  | 800000  | 26.789              | 3.128                    | 9.736                | PCDH15           | 855599           | 0.611              | FRA10C            |
| 149        | chr8       | 110600000 | 110600000 | 600000  | 26.66               | 2.897                    | 8.157                | SYBU             | 6362             | 0.384              | NA                |
| 46         | chr3       | 55700000  | 56100000  | 400000  | 26.623              | 0.799                    | 16.04                | MIR3938          | 103              | 0.162              | NA                |
| 36         | chr2       | 220100000 | 220600000 | 500000  | 26.44               | 0.7                      | 15.334               | MIR3132          | 75               | 0.265              | NA                |
| 185        | chr11      | 83600000  | 84300000  | 700000  | 26.323              | 2.801                    | 14.857               | DLG2             | 818268           | 0.552              | FRA11F            |
| 119        | chr6       | 126000000 | 126600000 | 600000  | 25.962              | 1.445                    | 10.282               | MIR5695          | 9926             | 0.697              | NA                |
| 135        | chr7       | 133600000 | 133900000 | 300000  | 25.694              | 2.362                    | 8.467                | LRGUK            | 136829           | 0.55               | FRA7H             |
| 270        | chrX       | 121400000 | 121800000 | 400000  | 25.22               | 2.784                    | 3.158                | GRIA3            | 20438            | 0.496              | FRAXF             |
| 161        | chr9       | 116500000 | 117100000 | 600000  | 25.203              | 0.399                    | 17.365               | KIF12            | 7420             | 0.19               | FRA9B and FRA9E   |
| 28         | chr2       | 153600000 | 154300000 | 700000  | 25.147              | 2.502                    | 9.624                | ARL6IP6          | 41219            | 0.092              | FRA2S             |
| 206        | chr13      | 80800000  | 81500000  | 700000  | 25.109              | 2.915                    | 4.331                | SPRY2            | 3683             | 1.229              | FRA13E            |
| 133        | chr7       | 109900000 | 111500000 | 1600000 | 25.017              | 3.067                    | 11.924               | LRRN3            | 34448            | 0.245              | FRA7K             |
| 204        | chr13      | 66500000  | 66900000  | 400000  | 24.291              | 2.162                    | 5.303                | PCDH9-AS2        | 89863            | 0.046              | FRA13B            |
| 110        | chr6       | 68800000  | 69100000  | 300000  | 24.195              | 2.63                     | 8.207                | ADGRB3           | 753772           | 0.062              | FRA6D             |
| 265        | chrX       | 91400000  | 92300000  | 900000  | 24.117              | 2.747                    | 2.398                | PCDH11X          | 787769           | 0.084              | FRAXF             |
| 134        | chr7       | 126600000 | 127000000 | 400000  | 24.094              | 3.062                    | 7.508                | GRM8             | 804918           | 0.104              | NA                |
| 11         | chr2       | 13500000  | 15500000  | 2000000 | 23.965              | 2.824                    | 15.173               | LRATD1           | 7359             | 0.365              | FRA2C             |
| 222        | chr14      | 66300000  | 67400000  | 1100000 | 23.351              | -1.048                   | 21.007               | GPHN             | 551609           | 0.779              | FRA14B and FRA14C |

|     |       |           |           |         |        |        |        |              |         |       |                        |
|-----|-------|-----------|-----------|---------|--------|--------|--------|--------------|---------|-------|------------------------|
| 178 | chr11 | 20900000  | 21400000  | 500000  | 23.108 | 2.737  | 11.774 | NELL1        | 220539  | 0.06  | FRA11C and FRA11I      |
| 102 | chr5  | 120100000 | 120600000 | 500000  | 23.034 | -0.137 | 10.154 | PRR16        | 70133   | 0.259 | NA                     |
| 15  | chr2  | 63100000  | 63700000  | 600000  | 22.803 | 0.444  | 14.652 | LOC100132215 | 3747    | 1.377 | FRA2S                  |
| 26  | chr2  | 141500000 | 141900000 | 400000  | 22.21  | 2.7    | 8.145  | LRP1B        | 1900275 | 0.203 | FRA2S                  |
| 1   | chr1  | 14100000  | 14800000  | 700000  | 22.068 | -0.337 | 27.643 | PRDM2        | 75719   | 0.093 | FRA1A and FRA1B        |
| 224 | chr14 | 78500000  | 80800000  | 2300000 | 21.738 | 1.576  | 13.043 | DIO2-AS1     | 244049  | 0.143 | NA                     |
| 228 | chr15 | 60600000  | 60900000  | 300000  | 21.577 | -0.441 | 30.413 | ANXA2        | 50836   | 0.623 | FRA15A                 |
| 131 | chr7  | 78000000  | 79400000  | 1400000 | 21.517 | 1.41   | 17.343 | MAGI2-AS3    | 18252   | 0.109 | FRA7J                  |
| 38  | chr3  | 3600000   | 4400000   | 800000  | 21.014 | 1.372  | 16.378 | LRRN1        | 48267   | 0.288 | NA                     |
| 23  | chr2  | 139400000 | 140000000 | 600000  | 20.955 | 3.034  | 9.573  | NXP2         | 111085  | 1.26  | FRA2S                  |
| 89  | chr5  | 21300000  | 22400000  | 1100000 | 20.674 | 2.966  | 6.991  | CDH12        | 461906  | 0.517 | FRA5E                  |
| 90  | chr5  | 28500000  | 29100000  | 600000  | 20.657 | 2.526  | 10     | LSP1P3       | 444     | 1.078 | FRA5A and FRA5E        |
| 109 | chr6  | 61700000  | 62200000  | 500000  | 20.082 | 2.705  | 10.574 | KHDRBS2      | 606236  | 0.068 | NA                     |
| 129 | chr7  | 40300000  | 40700000  | 400000  | 19.687 | 0.289  | 14.105 | SUGCT        | 725792  | 0.124 | NA                     |
| 80  | chr4  | 112900000 | 113400000 | 500000  | 19.532 | 0.62   | 14.62  | FAM241A      | 43685   | 0.132 | NA                     |
| 205 | chr13 | 68200000  | 68500000  | 300000  | 19.196 | 3.312  | 4.907  | PCDH9        | 5830    | 0.262 | FRA13B                 |
| 213 | chr14 | 37000000  | 37800000  | 800000  | 19.11  | 1.653  | 11.569 | SLC25A21-AS1 | 1768    | 0.16  | NA                     |
| 243 | chr18 | 52600000  | 53200000  | 600000  | 19.005 | 3.118  | 6.935  | MIR4529      | 78      | 0.004 | FRA18B                 |
| 50  | chr3  | 76100000  | 76600000  | 500000  | 19.004 | 2.476  | 8.81   | ROBO2        | 1712470 | 0.004 | NA                     |
| 194 | chr12 | 20700000  | 21300000  | 600000  | 18.968 | 1.971  | 7.838  | SLCO1B1      | 108603  | 0.172 | NA                     |
| 160 | chr9  | 105900000 | 106300000 | 400000  | 18.628 | 0.264  | 12.358 | CYLC2        | 23178   | 0.202 | NA                     |
| 145 | chr8  | 88900000  | 89800000  | 900000  | 18.623 | 1.598  | 11.417 | MMP16        | 290258  | 0.471 | NA                     |
| 49  | chr3  | 67100000  | 67700000  | 600000  | 18.54  | 2.919  | 12.64  | MIR4272      | 64      | 0.372 | NA                     |
| 81  | chr4  | 142200000 | 142600000 | 400000  | 18.501 | 0.319  | 9.993  | IL15         | 97392   | 0.386 | FRA4C                  |
| 6   | chr1  | 97300000  | 97600000  | 300000  | 18.463 | 2.023  | 8.263  | DPYD-AS1     | 227033  | 0.281 | FRA1M                  |
| 19  | chr2  | 132700000 | 133600000 | 900000  | 18.372 | 2.477  | 19.854 | MIR663B      | 115     | 0.043 | FRA2F and FRA2S        |
| 77  | chr4  | 92600000  | 93600000  | 1000000 | 18.231 | 2.203  | 7.992  | GRID2        | 912869  | 0.164 | FRA4E                  |
| 175 | chr10 | 107700000 | 108500000 | 800000  | 18.081 | 2.993  | 10.394 | SORCS1       | 591046  | 0.011 | FRA10D                 |
| 121 | chr6  | 147800000 | 148200000 | 400000  | 18.027 | 1.75   | 13.35  | SAMD5        | 61330   | 0.022 | NA                     |
| 29  | chr2  | 157800000 | 158300000 | 500000  | 17.792 | 0.613  | 15.68  | GALNT5       | 53574   | 0.266 | NA                     |
| 112 | chr6  | 82900000  | 83100000  | 200000  | 17.573 | 0.108  | 8.56   | IBTK         | 35691   | 0.261 | NA                     |
| 215 | chr14 | 40800000  | 41500000  | 700000  | 17.448 | 3.384  | 7.396  | LRFN5        | 296989  | 0.332 | NA                     |
| 113 | chr6  | 92200000  | 92500000  | 300000  | 17.111 | 2.552  | 5.18   | MIR4643      | 78      | 0.206 | FRA6G                  |
| 153 | chr9  | 9400000   | 10400000  | 1000000 | 16.928 | 3.046  | 5.286  | PTPRD        | 2298478 | 0.004 | NA                     |
| 35  | chr2  | 213600000 | 214500000 | 900000  | 16.583 | 3.181  | 8.364  | SPAG16-DT    | 7653    | 0.016 | NA                     |
| 152 | chr9  | 2300000   | 2600000   | 300000  | 16.545 | -1.057 | 10.217 | VLDLR-AS1    | 198712  | 0.576 | NA                     |
| 158 | chr9  | 78500000  | 78900000  | 400000  | 16.267 | 0.937  | 13.893 | PCSK5        | 284919  | 0.039 | NA                     |
| 116 | chr6  | 103900000 | 104400000 | 500000  | 16.235 | 2.875  | 6.502  | HACE1        | 57227   | 0.004 | FRA6F                  |
| 93  | chr5  | 60600000  | 61200000  | 600000  | 16.176 | 0.262  | 12.963 | C5orf64      | 68727   | 0.678 | FRA5H                  |
| 171 | chr10 | 75800000  | 76300000  | 500000  | 16.14  | -0.938 | 22.598 | ADK          | 558119  | 0.136 | FRA10D                 |
| 177 | chr10 | 115500000 | 115800000 | 300000  | 16.062 | 0.752  | 6.033  | MIR4483      | 62      | 0.193 | FRA10B and FRA10D      |
| 87  | chr5  | 11400000  | 11600000  | 200000  | 16.051 | 2.599  | 17.79  | CTNND2       | 617009  | 0.039 | NA                     |
| 108 | chr6  | 5200000   | 5700000   | 500000  | 15.895 | 2.344  | 17.49  | FARS2        | 510540  | 0.509 | FRA6B                  |
| 207 | chr13 | 91700000  | 92500000  | 800000  | 15.866 | 1.593  | 6.19   | LINC00379    | 84086   | 0.259 | NA                     |
| 20  | chr2  | 135300000 | 135700000 | 400000  | 15.858 | 0.733  | 12.183 | CCNT2-AS1    | 51974   | 0.658 | FRA2F and FRA2S        |
| 55  | chr3  | 114600000 | 114900000 | 300000  | 15.855 | -0.012 | 12.573 | ZBTB20       | 733315  | 0.706 | NA                     |
| 45  | chr3  | 54300000  | 54700000  | 400000  | 15.737 | 1.798  | 19.01  | ESRG         | 7734    | 0.011 | NA                     |
| 88  | chr5  | 12400000  | 12700000  | 300000  | 15.718 | 3.144  | 12.797 | LINC01194    | 230327  | 0.652 | NA                     |
| 79  | chr4  | 97300000  | 98200000  | 900000  | 15.611 | 2.787  | 9.437  | STPG2-AS1    | 123239  | 0.198 | FRA4E                  |
| 273 | chrX  | 142200000 | 142600000 | 400000  | 15.51  | 3.183  | 4.42   | SPANXN3      | 8744    | 0.025 | FRAXA, FRAXC and FRAXF |
| 214 | chr14 | 39700000  | 40100000  | 400000  | 15.437 | 2.441  | 9.968  | LOC100288846 | 1359    | 0.026 | NA                     |
| 12  | chr2  | 18800000  | 19100000  | 300000  | 15.381 | 1.352  | 18.1   | NT5C1B       | 26710   | 0.106 | FRA2C                  |
| 189 | chr11 | 90400000  | 90800000  | 400000  | 15.355 | 1.052  | 7.76   | MIR4490      | 84      | 0.162 | NA                     |
| 229 | chr16 | 7700000   | 8000000   | 300000  | 15.23  | 1.706  | 15.55  | RBFOX1       | 380590  | 0.884 | NA                     |
| 173 | chr10 | 85800000  | 86000000  | 200000  | 15.114 | 2.351  | 15.61  | GHITM        | 14127   | 0.267 | FRA10D                 |
| 27  | chr2  | 148000000 | 148300000 | 300000  | 15.08  | 2.413  | 9.807  | ACVR2A       | 86308   | 0.782 | FRA2K and FRA2S        |
| 242 | chr18 | 39100000  | 39600000  | 500000  | 15.071 | 3.103  | 6.596  | PIK3C3       | 16206   | 0.545 | FRA18A                 |
| 69  | chr4  | 32900000  | 34600000  | 1700000 | 14.87  | 2.392  | 11.432 | ARAP2        | 125615  | 0.381 | FRA4D                  |
| 34  | chr2  | 211700000 | 212300000 | 600000  | 14.819 | 2.975  | 6.955  | CPS1-IT1     | 2305    | 0.008 | NA                     |
| 70  | chr4  | 35900000  | 36400000  | 500000  | 14.779 | 2.53   | 13.586 | ARAP2        | 125615  | 0.85  | FRA4D                  |
| 233 | chr16 | 72400000  | 72800000  | 400000  | 14.736 | 0.612  | 10.708 | PMFBP1       | 53354   | 0.555 | FRA16B                 |
| 151 | chr8  | 136700000 | 137000000 | 300000  | 14.716 | 2.147  | 19.757 | KHDRBS3      | 65728   | 1.189 | NA                     |
| 111 | chr6  | 78000000  | 78200000  | 200000  | 14.713 | 3.035  | 6.975  | HTR1B        | 1173    | 0.045 | NA                     |

|     |       |           |           |         |        |        |        |            |         |       |                               |
|-----|-------|-----------|-----------|---------|--------|--------|--------|------------|---------|-------|-------------------------------|
| 176 | chr10 | 112700000 | 113100000 | 400000  | 14.678 | -1.13  | 19.493 | ADRA2A     | 3873    | 1.056 | FRA10B, FRA10D and FRA10E     |
| 132 | chr7  | 90800000  | 91200000  | 400000  | 14.561 | 0.972  | 23.475 | FZD1       | 4350    | 2.18  | FRA7E                         |
| 78  | chr4  | 94700000  | 95200000  | 500000  | 14.464 | 1.387  | 15.58  | ATOH1      | 1065    | 0.545 | FRA4E                         |
| 201 | chr13 | 35200000  | 35400000  | 200000  | 14.464 | 2.904  | 5.27   | LINC00457  | 205232  | 0.342 | FRA13A                        |
| 188 | chr11 | 89000000  | 89100000  | 100000  | 14.409 | 2.17   | 4.09   | TYR        | 117888  | 0.009 | FRA11F                        |
| 91  | chr5  | 59300000  | 59600000  | 300000  | 14.37  | 1.868  | 11.207 | PDE4D      | 276159  | 0.326 | FRA5H                         |
| 259 | chrX  | 10900000  | 11300000  | 400000  | 14.33  | -0.27  | 5.685  | HCCS       | 11799   | 0.132 | NA                            |
| 271 | chrX  | 128300000 | 129100000 | 800000  | 14.313 | 2.706  | 4.419  | UTP14A     | 23642   | 0.019 | FRAXF                         |
| 65  | chr4  | 12600000  | 13200000  | 600000  | 14.276 | 1.993  | 9.128  | RAB28      | 116643  | 0.09  | FRA4A and FRA4D               |
| 74  | chr4  | 85700000  | 86100000  | 400000  | 14.134 | 2.804  | 10.278 | WDFY3      | 296852  | 0.066 | FRA4E                         |
| 258 | chrX  | 7000000   | 7200000   | 200000  | 13.87  | 2.802  | 7.71   | MIR4767    | 78      | 0.169 | NA                            |
| 246 | chr20 | 8400000   | 8700000   | 300000  | 13.864 | 1.232  | 13.817 | PLCB1      | 187792  | 0.676 | FRA20B                        |
| 59  | chr3  | 158400000 | 158700000 | 300000  | 13.834 | 0.976  | 11.137 | RARRES1    | 35379   | 0.395 | FRA3D                         |
| 165 | chr10 | 54100000  | 54500000  | 400000  | 13.717 | 3.07   | 10.295 | DKK1       | 3377    | 0.007 | FRA10C and FRA10G             |
| 167 | chr10 | 57400000  | 57600000  | 200000  | 13.673 | 2.969  | 11.27  | PCDH15     | 1806764 | 0.259 | FRA10C                        |
| 5   | chr1  | 80700000  | 80900000  | 200000  | 13.564 | 3.118  | 7.515  | ADGRL2     | 686263  | 0.018 | FRA1L                         |
| 52  | chr3  | 78700000  | 79400000  | 700000  | 13.551 | 2.37   | 8.923  | ROBO1      | 91535   | 0.351 | NA                            |
| 31  | chr2  | 167400000 | 167800000 | 400000  | 13.494 | 3.043  | 9.953  | XIRP2      | 371265  | 0.047 | FRA2G                         |
| 274 | chrX  | 148500000 | 148600000 | 100000  | 13.304 | 1.649  | 5.87   | IDS        | 11677   | 0.306 | FRAXA, FRAXD, FRAXE and FRAXF |
| 107 | chr6  | 1900000   | 2100000   | 200000  | 13.19  | 1.198  | 13.16  | GMDS       | 552191  | 0.322 | NA                            |
| 117 | chr6  | 114300000 | 114600000 | 300000  | 13.074 | 2.432  | 7.9    | HS3ST5     | 7292    | 0.151 | FRA6F                         |
| 182 | chr11 | 38600000  | 39000000  | 400000  | 13.052 | 1.679  | 8.923  | LRRC4C     | 178930  | 0.439 | NA                            |
| 244 | chr18 | 53500000  | 53900000  | 400000  | 13.03  | 2.772  | 6.765  | LINC01539  | 54181   | 0.024 | FRA18B                        |
| 147 | chr8  | 103600000 | 104000000 | 400000  | 13.022 | 2.192  | 9.32   | AZIN1      | 37862   | 0.041 | FRA8A                         |
| 139 | chr8  | 34000000  | 34200000  | 200000  | 13.016 | 2.972  | 9.21   | DUSP26     | 8586    | 0.272 | NA                            |
| 115 | chr6  | 101700000 | 101800000 | 100000  | 12.935 | 3.212  | 5.27   | GRIK2      | 346350  | 0.117 | NA                            |
| 40  | chr3  | 8200000   | 8700000   | 500000  | 12.794 | -0.749 | 24.37  | LMCD1-AS1  | 307409  | 1.202 | NA                            |
| 239 | chr18 | 3900000   | 4100000   | 200000  | 12.708 | 0.002  | 36.965 | DLGAP1-AS4 | 51591   | 0.042 | NA                            |
| 250 | chr21 | 21100000  | 21400000  | 300000  | 12.652 | 2.988  | 7.597  | LINC00320  | 60514   | 0.082 | NA                            |
| 163 | chr10 | 9200000   | 9600000   | 400000  | 12.515 | 2.285  | 8.783  | GATA3      | 20498   | 0.16  | NA                            |
| 10  | chr1  | 245800000 | 246200000 | 400000  | 12.453 | 1.099  | 17.093 | KIF26B     | 42716   | 0.412 | FRA1I                         |
| 96  | chr5  | 65500000  | 66100000  | 600000  | 12.438 | -2.417 | 14.383 | MAST4      | 390176  | 1.261 | NA                            |
| 159 | chr9  | 83400000  | 83700000  | 300000  | 12.387 | 0.526  | 19.473 | TLE1       | 104999  | 0.668 | NA                            |
| 232 | chr16 | 63200000  | 63400000  | 200000  | 12.367 | 3      | 8.21   | CDH8       | 384825  | 0.085 | FRA16C                        |
| 13  | chr2  | 21400000  | 21700000  | 300000  | 12.281 | 2.493  | 16.5   | APOB       | 42645   | 1.031 | NA                            |
| 245 | chr18 | 69600000  | 69900000  | 300000  | 12.281 | 1.56   | 8.51   | CBLN2      | 6875    | 0.262 | FRA18C                        |
| 7   | chr1  | 174600000 | 174800000 | 200000  | 12.184 | 1.207  | 12.56  | RABGAP1L   | 294774  | 0.383 | FRA1G                         |
| 18  | chr2  | 122200000 | 122500000 | 300000  | 12.168 | 1.797  | 22.163 | RNU4ATAC   | 130     | 0.779 | FRA2S                         |
| 137 | chr7  | 141500000 | 141800000 | 300000  | 12.096 | 0.761  | 15.05  | OR9A4      | 945     | 0.613 | NA                            |
| 179 | chr11 | 28400000  | 28700000  | 300000  | 12.076 | 1.213  | 13.89  | METTL15    | 15697   | 0.262 | FRA11D                        |
| 61  | chr3  | 174800000 | 175500000 | 700000  | 12.052 | 3.041  | 5.474  | MIR4789    | 82      | 0.05  | NA                            |
| 125 | chr7  | 14400000  | 14600000  | 200000  | 12.04  | 3.003  | 7.95   | DGKB       | 696402  | 0.005 | NA                            |
| 63  | chr3  | 192400000 | 192600000 | 200000  | 11.974 | 2.509  | 15.18  | FGF12      | 588207  | 0.105 | NA                            |
| 17  | chr2  | 116500000 | 117400000 | 900000  | 11.925 | 3.084  | 13.054 | DPP10      | 682643  | 0.161 | FRA2S                         |
| 58  | chr3  | 131300000 | 131700000 | 400000  | 11.915 | 0.629  | 14.758 | MIR5704    | 77      | 0.54  | NA                            |
| 168 | chr10 | 64500000  | 64700000  | 200000  | 11.902 | 2.943  | 12.815 | EGR2       | 4371    | 0.105 | FRA10C                        |
| 103 | chr5  | 129400000 | 130400000 | 1000000 | 11.794 | 2.861  | 9.535  | HINT1      | 6066    | 0.176 | FRA5C                         |
| 162 | chr9  | 119500000 | 120200000 | 700000  | 11.753 | 2.339  | 18.247 | SNORA70C   | 136     | 0.021 | FRA9B and FRA9E               |
| 249 | chr21 | 16200000  | 16300000  | 100000  | 11.75  | 2.031  | 9.1    | NRIP1      | 103571  | 0.413 | NA                            |
| 39  | chr3  | 6800000   | 7300000   | 500000  | 11.745 | 2.525  | 9.878  | GRM7       | 832572  | 0.017 | NA                            |
| 122 | chr6  | 161800000 | 162800000 | 1000000 | 11.723 | 3.082  | 13.061 | PRKN       | 489464  | 0.104 | FRA6E                         |
| 240 | chr18 | 7900000   | 8100000   | 200000  | 11.708 | 1.605  | 27.615 | PTPRM      | 459931  | 0.566 | NA                            |
| 99  | chr5  | 93700000  | 94100000  | 400000  | 11.707 | 0.734  | 10.08  | KIAA0825   | 245659  | 0.739 | FRA5B and FRA5D               |
| 54  | chr3  | 109700000 | 110000000 | 300000  | 11.704 | 3.052  | 12.24  | LINC01205  | 85178   | 0.212 | NA                            |
| 41  | chr3  | 17200000  | 17500000  | 300000  | 11.555 | 2.705  | 8.973  | TBC1D5     | 150973  | 0.403 | NA                            |
| 106 | chr5  | 167900000 | 168100000 | 200000  | 11.544 | -1.395 | 27.38  | MIR103B1   | 62      | 2.076 | FRA5G                         |
| 252 | chr21 | 30900000  | 31500000  | 600000  | 11.484 | 0.727  | 28.592 | GRIK1-AS2  | 34708   | 0.454 | NA                            |
| 3   | chr1  | 57400000  | 58100000  | 700000  | 11.446 | 2.509  | 18.111 | DAB1       | 293260  | 0.021 | FRA1B                         |
| 183 | chr11 | 79000000  | 79200000  | 200000  | 11.412 | 2.334  | 39.7   | MIR708     | 88      | 0.386 | FRA11H                        |
| 203 | chr13 | 63900000  | 64000000  | 100000  | 11.388 | 3.675  | 4.33   | OR7E156P   | 5134    | 0.219 | FRA13B                        |
| 191 | chr11 | 116200000 | 116400000 | 200000  | 11.359 | -0.212 | 47.795 | BUD13      | 24829   | 0.288 | FRA11B and FRA11G             |
| 187 | chr11 | 87600000  | 87900000  | 300000  | 11.33  | 2.051  | 11.263 | RAB38      | 62221   | 0.023 | FRA11F                        |
| 48  | chr3  | 61800000  | 62100000  | 300000  | 11.307 | 2.132  | 14.933 | PTPRG      | 77317   | 0.639 | FRA3B                         |

|     |       |           |           |       |        |        |        |              |         |       |                   |
|-----|-------|-----------|-----------|-------|--------|--------|--------|--------------|---------|-------|-------------------|
| 266 | chrX  | 94400000  | 94600000  | 20000 | 11.298 | 3.013  | 5.295  | BRDTP1       | 817     | 0.322 | FRAXF             |
| 241 | chr18 | 36600000  | 37200000  | 60000 | 11.217 | 1.751  | 10.373 | MIR924HG     | 133715  | 0.261 | FRA18A            |
| 170 | chr10 | 66900000  | 67400000  | 50000 | 11.17  | 2.033  | 12.61  | ANXA2P3      | 1350    | 0.031 | FRA10C            |
| 174 | chr10 | 106800000 | 107000000 | 20000 | 11.157 | 2.42   | 13.41  | SORCS3       | 75140   | 0.064 | FRA10D            |
| 247 | chr20 | 13100000  | 13300000  | 20000 | 11.103 | 1.607  | 21.45  | ISM1-AS1     | 2268    | 0.361 | FRA20B            |
| 225 | chr14 | 82000000  | 82400000  | 40000 | 11.095 | 2.797  | 10.04  | SEL1L        | 62315   | 0.036 | NA                |
| 186 | chr11 | 84700000  | 85500000  | 80000 | 11.075 | 2.036  | 10.77  | DLG2         | 2172259 | 0.082 | FRA11F            |
| 260 | chrX  | 56000000  | 56300000  | 30000 | 11.022 | 3.116  | 8.23   | KLF8         | 37101   | 0.128 | FRAXF             |
| 114 | chr6  | 98300000  | 98600000  | 30000 | 10.923 | 1.921  | 6.463  | MIR2113      | 89      | 0.024 | NA                |
| 223 | chr14 | 67800000  | 68500000  | 70000 | 10.854 | -2.539 | 27.431 | VT11B        | 23736   | 0.393 | FRA14B and FRA14C |
| 140 | chr8  | 35500000  | 35600000  | 10000 | 10.846 | 3.069  | 8.78   | UNC5D        | 44525   | 0.032 | NA                |
| 9   | chr1  | 187300000 | 187400000 | 10000 | 10.813 | 2.791  | 6.21   | PLA2G4A      | 160082  | 0.462 | FRA1K             |
| 262 | chrX  | 65000000  | 65400000  | 40000 | 10.77  | 1.896  | 7.018  | VSIG4        | 18388   | 0.381 | FRAXF             |
| 256 | chr22 | 33500000  | 33700000  | 20000 | 10.725 | 2.165  | 24.885 | SYN3         | 545838  | 0.88  | FRA22B            |
| 43  | chr3  | 25200000  | 25400000  | 20000 | 10.69  | 2.82   | 13.02  | RARB         | 423600  | 0.031 | FRA3A             |
| 124 | chr7  | 11300000  | 11700000  | 40000 | 10.587 | 1.959  | 13.843 | THSD7A       | 9321    | 0.029 | NA                |
| 14  | chr2  | 32600000  | 33000000  | 40000 | 10.553 | -0.154 | 21.688 | MIR4765      | 77      | 0.417 | NA                |
| 219 | chr14 | 48800000  | 48900000  | 10000 | 10.54  | 2.986  | 14.5   | LINC00648    | 30062   | 0.003 | NA                |
| 120 | chr6  | 129200000 | 129400000 | 20000 | 10.514 | 1.279  | 9.73   | LAMA2        | 633425  | 0.056 | NA                |
| 263 | chrX  | 67800000  | 68000000  | 20000 | 10.507 | 2.487  | 6.52   | STARD8       | 78174   | 0.026 | FRAXF             |
| 100 | chr5  | 94600000  | 95000000  | 40000 | 10.481 | 1.344  | 10.855 | ARSK         | 1933    | 0.897 | FRA5B and FRA5D   |
| 136 | chr7  | 137000000 | 137300000 | 30000 | 10.475 | 1.506  | 6.65   | PTN          | 116455  | 0.266 | NA                |
| 142 | chr8  | 51500000  | 51700000  | 20000 | 10.475 | 3.26   | 13.02  | SNTG1        | 620307  | 0.021 | NA                |
| 231 | chr16 | 47400000  | 47500000  | 10000 | 10.456 | 2.579  | 11.77  | PHKB         | 86250   | 0.917 | NA                |
| 154 | chr9  | 16000000  | 16400000  | 40000 | 10.445 | -1.811 | 20.958 | C9orf92      | 49173   | 0.064 | FRA9G             |
| 144 | chr8  | 88100000  | 88500000  | 40000 | 10.413 | 3.081  | 12.805 | CNBD1        | 516280  | 0.296 | NA                |
| 127 | chr7  | 31800000  | 32000000  | 20000 | 10.351 | 1.068  | 15.695 | PPP1R17      | 21439   | 0.144 | NA                |
| 57  | chr3  | 117300000 | 117700000 | 40000 | 10.317 | 2.916  | 13.118 | TUSC7        | 7253    | 0.009 | NA                |
| 169 | chr10 | 66300000  | 66700000  | 40000 | 10.289 | 2.315  | 11.498 | ANXA2P3      | 1350    | 0.01  | FRA10C            |
| 104 | chr5  | 136900000 | 137400000 | 50000 | 10.263 | 0.865  | 15.04  | MIR874       | 78      | 0.048 | FRA5C             |
| 193 | chr12 | 19600000  | 19700000  | 10000 | 10.187 | 0.81   | 13.24  | AEBP2        | 81659   | 0.291 | NA                |
| 190 | chr11 | 106900000 | 107100000 | 20000 | 10.183 | 0.783  | 12.795 | GUCY1A2      | 344434  | 0.266 | NA                |
| 211 | chr14 | 29800000  | 30000000  | 20000 | 10.177 | 2.034  | 12.935 | MIR548AI     | 278492  | 0.321 | NA                |
| 143 | chr8  | 71000000  | 71100000  | 10000 | 10.153 | 2.26   | 15.01  | NCOA2        | 36452   | 0.093 | NA                |
| 264 | chrX  | 75300000  | 75700000  | 40000 | 10.145 | 3.09   | 7.273  | PBDC1        | 751     | 0.127 | FRAXF             |
| 56  | chr3  | 116000000 | 116200000 | 20000 | 10.1   | 1.827  | 13.68  | LSAMP        | 643176  | 0.263 | NA                |
| 83  | chr4  | 144600000 | 144800000 | 20000 | 10.034 | 0.548  | 12.695 | FREM3        | 123268  | 0.124 | NA                |
| 8   | chr1  | 176200000 | 176800000 | 60000 | 9.976  | 2.774  | 14.612 | PAPPA2       | 228035  | 0.094 | FRA1G             |
| 227 | chr15 | 27100000  | 27300000  | 20000 | 9.859  | 2.937  | 18.125 | GABRA5       | 82492   | 0.126 | NA                |
| 148 | chr8  | 105500000 | 105800000 | 30000 | 9.85   | 2.135  | 10.147 | LRP12        | 6912    | 0.457 | FRA8A             |
| 85  | chr4  | 150300000 | 150600000 | 30000 | 9.787  | 0.689  | 10.72  | DCLK2        | 179183  | 0.443 | NA                |
| 82  | chr4  | 143700000 | 143800000 | 10000 | 9.612  | 1.55   | 9.71   | INPP4B       | 818423  | 0.148 | NA                |
| 97  | chr5  | 81000000  | 81300000  | 30000 | 9.508  | -0.876 | 16.803 | SSBP2        | 333894  | 0.307 | NA                |
| 94  | chr5  | 62800000  | 63000000  | 20000 | 9.479  | 2.687  | 10.705 | HTR1A        | 2245    | 0.019 | FRA5H             |
| 42  | chr3  | 20400000  | 20800000  | 40000 | 9.454  | 2.747  | 10.32  | SGO1         | 17789   | 0.018 | NA                |
| 202 | chr13 | 57600000  | 57800000  | 20000 | 9.437  | 3.267  | 6.8    | PRR20B       | 3022    | 0.165 | FRA13B and FRA13C |
| 221 | chr14 | 65400000  | 65700000  | 30000 | 9.42   | 0.6    | 20.76  | LOC100506321 | 4394    | 0.601 | FRA14B            |
| 184 | chr11 | 79600000  | 79700000  | 10000 | 9.373  | 2.713  | 25.16  | TENM4        | 787368  | 0.004 | NA                |
| 197 | chr12 | 81400000  | 81500000  | 10000 | 9.372  | 2.548  | 5.95   | ACSS3        | 177774  | 0.008 | FRA12B            |
| 150 | chr8  | 112400000 | 112500000 | 10000 | 9.35   | 2.644  | 7.87   | CSMD3        | 27507   | 0.246 | NA                |
| 105 | chr5  | 145200000 | 145400000 | 20000 | 9.325  | 1.383  | 11.85  | PRELID2      | 76318   | 0.075 | NA                |
| 51  | chr3  | 77100000  | 77200000  | 10000 | 8.943  | 3.387  | 8.88   | ROBO2        | 609821  | 0.004 | NA                |
| 64  | chr4  | 11300000  | 11400000  | 10000 | 8.927  | 2.173  | 10.51  | MIR572       | 95      | 0.07  | FRA4A and FRA4D   |
| 257 | chr22 | 35100000  | 35300000  | 20000 | 8.925  | -3.261 | 55.72  | ISX          | 21251   | 1.71  | FRA22A            |
| 98  | chr5  | 84100000  | 84300000  | 20000 | 8.921  | -0.851 | 9.985  | EDIL3        | 442486  | 2.247 | NA                |
| 22  | chr2  | 138200000 | 138500000 | 30000 | 8.87   | 0.345  | 11.293 | HNMT         | 3207    | 0.291 | FRA2F and FRA2S   |
| 75  | chr4  | 86400000  | 86900000  | 50000 | 8.827  | 0.595  | 12.294 | MIR4451      | 66      | 0.276 | FRA4E             |
| 212 | chr14 | 32100000  | 32500000  | 40000 | 8.797  | -0.92  | 14.303 | NUBPL        | 146655  | 0.233 | NA                |
| 141 | chr8  | 47600000  | 47800000  | 20000 | 8.78   | 0.235  | 21.44  | LINC00293    | 13484   | 0.842 | NA                |
| 92  | chr5  | 59800000  | 59900000  | 10000 | 8.737  | 2.548  | 14.47  | PDE4D        | 501698  | 0.025 | FRA5H             |
| 71  | chr4  | 36900000  | 37000000  | 10000 | 8.732  | 1.591  | 15.27  | MIR4801      | 82      | 0.012 | FRA4D             |
| 67  | chr4  | 21300000  | 21600000  | 30000 | 8.658  | 1.327  | 7.563  | KCNIP4       | 575291  | 0.052 | FRA4D             |
| 238 | chr17 | 60600000  | 61300000  | 70000 | 8.62   | -0.469 | 26.654 | MARCHF10     | 105337  | 0.449 | NA                |

|     |       |           |           |         |       |        |        |              |        |       |                   |
|-----|-------|-----------|-----------|---------|-------|--------|--------|--------------|--------|-------|-------------------|
| 196 | chr12 | 77700000  | 77900000  | 200000  | 8.552 | 0.333  | 6.865  | E2F7         | 44335  | 0.037 | NA                |
| 255 | chr22 | 27900000  | 28600000  | 700000  | 8.364 | -2.128 | 33.976 | MIR3199-2    | 86     | 0.688 | FRA22B            |
| 128 | chr7  | 33600000  | 33800000  | 200000  | 8.299 | 1.872  | 27.105 | BMPER        | 250962 | 0.303 | FRA7C             |
| 73  | chr4  | 84800000  | 84900000  | 100000  | 8.22  | 1.019  | 11.01  | GPAT3        | 69558  | 1.004 | NA                |
| 253 | chr22 | 24700000  | 24800000  | 100000  | 8.216 | -1.934 | 50.05  | SPECC1L      | 75633  | 0.006 | NA                |
| 84  | chr4  | 148100000 | 148200000 | 100000  | 8.212 | 1.701  | 14.7   | EDNRA        | 64038  | 0.463 | NA                |
| 76  | chr4  | 88800000  | 88900000  | 100000  | 8.123 | 1.205  | 11.02  | SPP1         | 7762   | 0.586 | FRA4E             |
| 155 | chr9  | 17500000  | 17600000  | 100000  | 8.107 | 1.613  | 12.44  | SH3GL2       | 218170 | 0.125 | FRA9G             |
| 272 | chrX  | 138800000 | 138900000 | 100000  | 8.099 | 2.939  | 4.98   | ATP11C       | 42089  | 0.02  | FRAXC and FRAXF   |
| 254 | chr22 | 25500000  | 25900000  | 400000  | 8.089 | -1.295 | 56.253 | KIAA1671-AS1 | 10276  | 1.516 | NA                |
| 220 | chr14 | 49100000  | 49800000  | 700000  | 7.941 | -0.89  | 32.311 | RPS29        | 9745   | 0.663 | NA                |
| 192 | chr11 | 131800000 | 131900000 | 100000  | 7.89  | -0.794 | 18.47  | NTM          | 426005 | 0.958 | NA                |
| 156 | chr9  | 27000000  | 27100000  | 100000  | 7.853 | -0.912 | 21.97  | LRRC19       | 12557  | 1.011 | FRA9C             |
| 269 | chrX  | 99500000  | 99800000  | 300000  | 7.783 | 2.96   | 6.033  | PCDH19       | 118630 | 0.664 | FRAXF             |
| 217 | chr14 | 44800000  | 46000000  | 1200000 | 7.75  | 1.531  | 19.343 | SNORD127     | 99     | 0.437 | NA                |
| 44  | chr3  | 29600000  | 29700000  | 100000  | 7.602 | -0.034 | 9.82   | RBMS3        | 729084 | 0.425 | NA                |
| 30  | chr2  | 159400000 | 159700000 | 300000  | 7.576 | -1.576 | 11.203 | PKP4         | 104158 | 0.946 | NA                |
| 226 | chr14 | 83600000  | 83700000  | 100000  | 7.536 | 2.983  | 6.71   | SEL1L        | 35052  | 0.295 | NA                |
| 138 | chr8  | 28000000  | 30000000  | 200000  | 7.504 | 0.573  | 9.255  | CSMD1        | 252613 | 0.436 | NA                |
| 236 | chr17 | 58700000  | 59000000  | 300000  | 7.487 | -1.68  | 31.36  | BCAS3        | 360244 | 0.34  | FRA17B            |
| 261 | chrX  | 57100000  | 57200000  | 100000  | 7.246 | 2.625  | 10.53  | SPIN2B       | 1865   | 0.516 | FRAXF             |
| 95  | chr5  | 65200000  | 65300000  | 100000  | 7.205 | -1.971 | 8.49   | LOC100303749 | 769    | 0.372 | NA                |
| 237 | chr17 | 59200000  | 59300000  | 100000  | 6.824 | -2.565 | 41.49  | BCAS3        | 235383 | 0.3   | FRA17B            |
| 68  | chr4  | 32100000  | 32200000  | 100000  | 6.746 | 2.962  | 13.17  | PCDH7        | 426387 | 1.593 | FRA4D             |
| 180 | chr11 | 29000000  | 29100000  | 100000  | 6.431 | 1.152  | 9.15   | METTL15      | 15697  | 0.017 | FRA11D and FRA11E |
| 230 | chr16 | 46300000  | 46400000  | 100000  | 4.249 | 2.376  | 27.64  | ANKRD26P1    | 49064  | 0.004 | NA                |
