# Supplementary material
Source: PubMed Central journal article supplement (PMC7785011)
Supplement: 41422_2020_357_MOESM9_ESM.pdf [file 41422_2020_357_MOESM9_ESM.pdf]

**Supplementary Table S2 | MDSs identified in HeLa cells**

| MDS (HeLa) | Chromosome | Start     | End       | MiDASeq signal (FC) | The closest gene | Known CFS       |
|------------|------------|-----------|-----------|---------------------|------------------|-----------------|
| 1          | chr1       | 71200000  | 72600000  | 1.146               | NEGR1-IT1        | FRA1C and FRA1L |
| 2          | chr1       | 97400000  | 97500000  | 0.361               | DPYD-AS1         | FRA1M           |
| 3          | chr1       | 174600000 | 174800000 | 0.590               | RABGAP1L         | FRA1G           |
| 4          | chr1       | 245900000 | 246100000 | 0.527               | SMYD3            | FRA1I           |
| 5          | chr2       | 14900000  | 15400000  | 0.538               | NBAS             | FRA2C           |
| 6          | chr2       | 18700000  | 18900000  | 0.382               | NT5C1B           | FRA2C           |
| 7          | chr2       | 63300000  | 63500000  | 0.336               | WDPCP            | FRA2S           |
| 8          | chr2       | 77800000  | 78400000  | 0.881               | LINC01851        | FRA2S           |
| 9          | chr2       | 81600000  | 81800000  | 0.406               | LINC01815        | FRA2L and FRA2S |
| 10         | chr2       | 132800000 | 132900000 | 0.390               | NCKAP5-AS1       | FRA2S           |
| 11         | chr2       | 141000000 | 142300000 | 0.750               | LRP1B            | FRA2K and FRA2S |
| 12         | chr2       | 148000000 | 148200000 | 0.452               | ORC4             | FRA2K and FRA2S |
| 13         | chr2       | 153600000 | 154300000 | 1.001               | GALNT13          | FRA2S           |
| 14         | chr2       | 186000000 | 186500000 | 0.797               | LINC01473        | FRA2H           |
| 15         | chr2       | 204800000 | 205400000 | 0.982               | PARD3B           | FRA2I           |
| 16         | chr3       | 3500000   | 4300000   | 0.621               | LOC100130207     | NA              |
| 17         | chr3       | 6600000   | 7000000   | 0.587               | GRM7-AS3         | NA              |
| 18         | chr3       | 17300000  | 17400000  | 0.347               | TBC1D5           | NA              |
| 19         | chr3       | 20400000  | 20500000  | 0.309               | LOC101927829     | NA              |
| 20         | chr3       | 29500000  | 29700000  | 0.411               | RBMS3            | NA              |
| 21         | chr3       | 54200000  | 54700000  | 0.521               | CACNA2D3         | NA              |
| 22         | chr3       | 61800000  | 62200000  | 0.661               | PTPRG            | FRA3B           |
| 23         | chr3       | 67200000  | 68300000  | 0.973               | MIR4272          | NA              |
| 24         | chr3       | 114600000 | 115000000 | 0.454               | MIR4796          | NA              |
| 25         | chr3       | 144000000 | 144400000 | 1.056               | DIPK2A           | NA              |
| 26         | chr3       | 174800000 | 175200000 | 0.382               | NAALADL2-AS3     | NA              |
| 27         | chr4       | 12800000  | 13200000  | 0.668               | RAB28            | FRA4A and FRA4D |
| 28         | chr4       | 19000000  | 19800000  | 2.036               | SLIT2            | FRA4D           |
| 29         | chr4       | 97800000  | 98200000  | 0.408               | STPG2            | FRA4E           |
| 30         | chr4       | 144800000 | 145000000 | 0.467               | GYPA             | NA              |
| 31         | chr5       | 12200000  | 12700000  | 0.661               | LINC01194        | NA              |
| 32         | chr5       | 58900000  | 59600000  | 0.557               | PDE4D            | FRA5H           |
| 33         | chr5       | 65600000  | 65800000  | 0.342               | SHLD3            | NA              |
| 34         | chr5       | 93800000  | 94700000  | 0.599               | KIAA0825         | FRA5B and FRA5D |
| 35         | chr5       | 104200000 | 104300000 | 0.323               | NUDT12           | FRA5F           |
| 36         | chr5       | 136900000 | 137300000 | 0.355               | SPOCK1           | FRA5C           |
| 37         | chr6       | 1900000   | 2100000   | 0.320               | GMDS             | NA              |

|    |       |           |           |       |              |                   |
|----|-------|-----------|-----------|-------|--------------|-------------------|
| 38 | chr6  | 5200000   | 5700000   | 0.695 | LOC101927950 | FRA6B             |
| 39 | chr6  | 19500000  | 19600000  | 0.365 | LOC100506885 | NA                |
| 40 | chr6  | 98600000  | 98700000  | 0.337 | POU3F2       | NA                |
| 41 | chr6  | 100800000 | 101900000 | 0.624 | ASCC3        | NA                |
| 42 | chr6  | 104000000 | 104600000 | 0.636 | HACE1        | FRA6F             |
| 43 | chr6  | 147100000 | 147200000 | 0.316 | LUADT1       | NA                |
| 44 | chr7  | 70000000  | 70600000  | 1.107 | AUTS2        | FRA7J             |
| 45 | chr7  | 110700000 | 111300000 | 0.862 | LRRN3        | FRA7K             |
| 46 | chr7  | 133500000 | 134000000 | 0.951 | EXOC4        | FRA7H             |
| 47 | chr7  | 141500000 | 141700000 | 0.393 | AGK          | NA                |
| 48 | chr8  | 99400000  | 99600000  | 0.364 | MIR875       | FRA8B             |
| 49 | chr8  | 136800000 | 136900000 | 0.356 | LINC02055    | NA                |
| 50 | chr9  | 2300000   | 2600000   | 0.361 | VLDLR-AS1    | NA                |
| 51 | chr9  | 3300000   | 3500000   | 0.360 | RFX3         | NA                |
| 52 | chr9  | 17600000  | 18100000  | 0.478 | ADAMTSL1     | FRA9C and FRA9G   |
| 53 | chr9  | 28200000  | 29000000  | 1.289 | MIR876       | FRA9C             |
| 54 | chr9  | 105900000 | 106300000 | 0.519 | LINC01505    | NA                |
| 55 | chr10 | 53500000  | 53700000  | 0.534 | PCDH15       | FRA10C and FRA10G |
| 56 | chr11 | 22900000  | 23000000  | 0.364 | CCDC179      | FRA11C and FRA11I |
| 57 | chr11 | 28400000  | 28900000  | 0.468 | MIR8068      | FRA11D            |
| 58 | chr11 | 31400000  | 31500000  | 0.384 | DNAJC24      | FRA11E            |
| 59 | chr11 | 38800000  | 39000000  | 0.320 | LINC01493    | NA                |
| 60 | chr11 | 79100000  | 79800000  | 0.583 | MIR708       | NA                |
| 61 | chr11 | 80800000  | 81200000  | 0.505 | LINC02720    | NA                |
| 62 | chr12 | 79200000  | 79400000  | 0.361 | SYT1         | FRA12B            |
| 63 | chr12 | 99000000  | 100200000 | 1.438 | MIR1827      | NA                |
| 64 | chr12 | 102600000 | 102700000 | 0.375 | IGF1         | NA                |
| 65 | chr13 | 66500000  | 67000000  | 0.480 | PCDH9-AS2    | FRA13B            |
| 66 | chr13 | 91700000  | 92700000  | 0.855 | MIR548AS     | NA                |
| 67 | chr14 | 27200000  | 27400000  | 0.419 | LINC00645    | NA                |
| 68 | chr14 | 37200000  | 37800000  | 0.660 | MIPOL1       | NA                |
| 69 | chr14 | 46200000  | 46300000  | 0.394 | LINC00871    | NA                |
| 70 | chr14 | 66400000  | 66900000  | 0.511 | GPHN         | FRA14B and FRA14C |
| 71 | chr16 | 72500000  | 72800000  | 0.457 | LINC01572    | FRA16B            |
| 72 | chr16 | 78200000  | 79100000  | 1.991 | WVOX         | FRA16D            |
| 73 | chr18 | 7900000   | 8000000   | 0.355 | PTPRM        | NA                |
| 74 | chr18 | 39300000  | 39600000  | 1.216 | MIR924HG     | NA                |
| 75 | chr20 | 8500000   | 8600000   | 0.352 | PLCB1        | FRA20B            |
| 76 | chr20 | 13100000  | 13200000  | 0.359 | SPTLC3       | FRA20B            |

|    |      |           |           |       |           |                        |
|----|------|-----------|-----------|-------|-----------|------------------------|
| 77 | chrX | 6800000   | 7600000   | 1.647 | MIR4767   | NA                     |
| 78 | chrX | 8000000   | 8200000   | 0.473 | VCX2      | NA                     |
| 79 | chrX | 10700000  | 11000000  | 0.456 | MID1      | NA                     |
| 80 | chrX | 55900000  | 56000000  | 0.347 | KLF8      | FRAXF                  |
| 81 | chrX | 63400000  | 63600000  | 0.409 | LINC01278 | FRAXF                  |
| 82 | chrX | 99500000  | 99800000  | 0.785 | PCDH19    | FRAXF                  |
| 83 | chrX | 108400000 | 108600000 | 0.487 | COL4A5    | FRAXF                  |
| 84 | chrX | 121400000 | 121600000 | 0.365 | MIR3672   | FRAXF                  |
| 85 | chrX | 142200000 | 142600000 | 0.707 | MAGEC2    | FRAXA, FRAXC and FRAXF |
