# Supplementary material
Source: PubMed Central journal article supplement (PMC7785011)
Supplement: 41422_2020_357_MOESM10_ESM.pdf [file 41422_2020_357_MOESM10_ESM.pdf]

**Supplementary Table S3 | MDSs identified in HBE cells**

| MDS (HBE) | Chromosome | Start     | End       | MiDASeq signal (FC) | The closest gene | Known CFS         |
|-----------|------------|-----------|-----------|---------------------|------------------|-------------------|
| 1         | chr1       | 71700000  | 71900000  | 0.506               | NEGR1-IT1        | FRA1L             |
| 2         | chr1       | 72200000  | 72400000  | 0.475               | NEGR1            | FRA1L             |
| 3         | chr2       | 78100000  | 78300000  | 0.441               | LOC101927967     | FRA2S             |
| 4         | chr2       | 133100000 | 133300000 | 0.451               | NCKAP5-AS2       | FRA2F and FRA2S   |
| 5         | chr2       | 153800000 | 154100000 | 0.495               | GALNT13          | FRA2S             |
| 6         | chr2       | 205000000 | 205100000 | 0.615               | PARD3B           | FRA2I             |
| 7         | chr3       | 60200000  | 60800000  | 0.570               | MIR548BB         | FRA3B             |
| 8         | chr3       | 62000000  | 62100000  | 0.513               | PTPRG            | FRA3B             |
| 9         | chr3       | 67400000  | 67600000  | 0.500               | SUCLG2           | NA                |
| 10        | chr3       | 114600000 | 114800000 | 0.430               | MIR4796          | NA                |
| 11        | chr4       | 90500000  | 91300000  | 0.593               | CCSER1           | FRA4E             |
| 12        | chr4       | 142400000 | 142500000 | 0.463               | INPP4B           | FRA4C             |
| 13        | chr5       | 101500000 | 101900000 | 0.725               | SLCO4C1          | FRA5F             |
| 14        | chr7       | 133600000 | 133800000 | 0.431               | EXOC4            | FRA7H             |
| 15        | chr10      | 76000000  | 76200000  | 0.554               | LRMDA            | FRA10D            |
| 16        | chr11      | 29200000  | 29300000  | 0.447               | LINC02546        | FRA11E            |
| 17        | chr13      | 93600000  | 94100000  | 1.000               | GPC6-AS2         | FRA13D            |
| 18        | chr14      | 37300000  | 37400000  | 0.450               | MIPOL1           | NA                |
| 19        | chr14      | 66600000  | 66700000  | 0.402               | GPHN             | FRA14B and FRA14C |
| 20        | chr16      | 72600000  | 72700000  | 0.448               | LINC01572        | FRA16B            |
| 21        | chr16      | 78300000  | 78900000  | 0.793               | WVOX             | FRA16D            |
| 22        | chr16      | 83000000  | 83300000  | 0.587               | LOC101928417     | FRA16D            |
| 23        | chr18      | 7900000   | 8000000   | 0.439               | PTPRM            | NA                |
| 24        | chr18      | 36800000  | 36900000  | 0.437               | TPGS2            | FRA18A            |
| 25        | chr21      | 40300000  | 40500000  | 0.573               | DSCAM-AS1        | NA                |
| 26        | chr22      | 33500000  | 33700000  | 0.522               | LARGE1           | FRA22B            |
| 27        | chrX       | 97000000  | 97100000  | 0.512               | RPA4             | FRAXF             |
