# Supplementary material
Source: PubMed Central journal article supplement (PMC7785011)
Supplement: 41422_2020_357_MOESM11_ESM.pdf [file 41422_2020_357_MOESM11_ESM.pdf]

**Supplementary Table S4 | Association between RDCs and MDSs**

| <b>Recurrent DSB Clusters genes in mouse NSPCs</b> | <b>Human homolog gene</b> | <b>Association with MDSs</b> |
|----------------------------------------------------|---------------------------|------------------------------|
| BAI3                                               | ADGRB3                    | Overlapped                   |
| PARD3B                                             | PARD3B                    | Overlapped                   |
| GRIK2                                              | GRIK2                     | Overlapped                   |
| GPC6                                               | GPC6                      | Overlapped                   |
| CTNND2                                             | CTNND2                    | Overlapped                   |
| CSMD3                                              | CSMD3                     | Overlapped                   |
| RBFOX1                                             | RBFOX1                    | Overlapped                   |
| FGF12                                              | FGF12                     | Overlapped                   |
| LSAMP                                              | LSAMP                     | Overlapped                   |
| DCC                                                | DCC                       | Overlapped                   |
| PRKG1                                              | PRKG1                     | Overlapped                   |
| MAGI2                                              | MAGI2                     | Overlapped                   |
| SDK1                                               | SDK1                      | Overlapped                   |
| PTN                                                | PTN                       | Overlapped                   |
| CSMD1                                              | CSMD1                     | Overlapped                   |
| CDH13                                              | CDH13                     | Overlapped                   |
| NTM                                                | NTM                       | Overlapped                   |
| WWOX                                               | WWOX                      | Overlapped                   |
| DGKB                                               | DGKB                      | Overlapped                   |
| MDGA2                                              | MDGA2                     | Overlapped                   |
| NRXN3                                              | NRXN3                     | Overlapped                   |
| OXR1                                               | OXR1                      | Proximal (less than 1 Mb)    |
| NPAS3                                              | NPAS3                     | Proximal (less than 1 Mb)    |
| CADM2                                              | CADM2                     | Distant (more than 3 Mb)     |

|        |        |                          |
|--------|--------|--------------------------|
| NRXN1  | NRXN1  | Distant (more than 3 Mb) |
| NFIA   | NFIA   | Distant (more than 3 Mb) |
| CTNNA2 | CTNNA2 | Distant (more than 3 Mb) |
