# Supplementary material
Source: PubMed Central journal article supplement (PMC7785011)
Supplement: 41422_2020_357_MOESM12_ESM.pdf [file 41422_2020_357_MOESM12_ESM.pdf]

## Supplementary Table S5 | Deposited data and analysis

### Deposited Data

| Resource                                  | Source                                         | Identifier                                                                                                                |
|-------------------------------------------|------------------------------------------------|---------------------------------------------------------------------------------------------------------------------------|
| The Repli-seq dataset                     | GEO                                            | GSM3759850, GSM3759851                                                                                                    |
| Replication origin dataset                | GEO                                            | GSM2125829, GSM2125830                                                                                                    |
| Nascent RNA-seq dataset                   | GEO                                            | GSM1671336, GSM1671337,<br>GSM1671338, GSM1671339                                                                         |
| H3K36me3 and H3K9me3<br>ChIP-seq datasets | GEO                                            | GSM788076, GSM788078,<br>GSM788069 (Input)                                                                                |
| H3K4me3 and H3K27me3<br>ChIP-seq datasets | GEO                                            | GSM871043, GSM871044,<br>GSM871045 (Input)                                                                                |
| H3K9me2 and H3K27ac<br>ChIP-seq datasets  | GEO                                            | GSM2341638, GSM2341636,<br>GSM2341640 (Input)                                                                             |
| DNase-seq dataset                         | GEO                                            | GSM4221655                                                                                                                |
| Human evolutionary break<br>points        | GitHub<br>Supporting data<br>RECOMB-CG<br>2019 | <a href="https://github.com/bioinfoUQA/M/RECOMB-CG-2019_supp">https://github.com/bioinfoUQA<br/>M/RECOMB-CG-2019_supp</a> |

## Software and Algorithms

| Resource      | Source                                               | Identifier                                                                                                                                    |
|---------------|------------------------------------------------------|-----------------------------------------------------------------------------------------------------------------------------------------------|
| Trim Galore   | Babraham<br>Bioinformatics                           | <a href="https://www.bioinformatics.babraham.ac.uk/projects/trim_galore/">https://www.bioinformatics.babraham.ac.uk/projects/trim_galore/</a> |
| SRA-Tools     | SRA Toolkit<br>Development Team from<br>NCBI         | <a href="http://ncbi.github.io/sra-tools/">http://ncbi.github.io/sra-tools/</a>                                                               |
| Bowtie2       | Langmead, B. &<br>Salzberg, S. L., 2012 <sup>1</sup> | <a href="http://bowtie-bio.sourceforge.net/bowtie2/index.shtml">http://bowtie-bio.sourceforge.net/bowtie2/index.shtml</a>                     |
| HISAT2        | Kim, D. et al., 2015 <sup>2</sup>                    | <a href="https://ccb.jhu.edu/software/hisat2/index.shtml">https://ccb.jhu.edu/software/hisat2/index.shtml</a>                                 |
| FeatureCounts | Liao, Y. et al., 2014 <sup>3</sup>                   | <a href="http://bioinf.wehi.edu.au/featureCounts/">http://bioinf.wehi.edu.au/featureCounts/</a>                                               |
| HOMER         | Heinz, S. et al., 2010 <sup>4</sup>                  | <a href="http://homer.ucsd.edu/homer/ngs/ucsc.html">http://homer.ucsd.edu/homer/ngs/ucsc.html</a>                                             |
| SAMtools      | Li, H. et al., 2009 <sup>5</sup>                     | <a href="http://samtools.sourceforge.net/">http://samtools.sourceforge.net/</a>                                                               |
| Bedtools      | Quinlan, A. R. & Hall, I. M., 2010 <sup>6</sup>      | <a href="https://bedtools.readthedocs.io/en/latest/">https://bedtools.readthedocs.io/en/latest/</a>                                           |
| DeepTools2    | Ramirez, F. et al., 2016 <sup>7</sup>                | <a href="https://deeptools.readthedocs.io/en/develop/index.html#">https://deeptools.readthedocs.io/en/develop/index.html#</a>                 |
| R             | R Development Core<br>Team, 2008                     | <a href="https://www.r-project.org/">https://www.r-project.org/</a>                                                                           |
| SICER2        | Zang, C. et al., 2009 <sup>8</sup>                   | <a href="https://zanglab.github.io/SICER2/">https://zanglab.github.io/SICER2/</a>                                                             |
| GATK4         | McKenna, A. et al.,<br>2010 <sup>9</sup>             | <a href="https://software.broadinstitute.org/gatk/">https://software.broadinstitute.org/gatk/</a>                                             |
| Control-FREEC | Boeva, V. et al., 2012 <sup>10</sup>                 | <a href="http://boevalab.inf.ethz.ch/FREEC/index.html">http://boevalab.inf.ethz.ch/FREEC/index.html</a>                                       |

|                                   |                                                                                             |                                                                                                                                                                                                                                 |
|-----------------------------------|---------------------------------------------------------------------------------------------|---------------------------------------------------------------------------------------------------------------------------------------------------------------------------------------------------------------------------------|
| Circos                            | Krzywinski, M. et al., 2009 <sup>11</sup>                                                   | <a href="http://www.circos.ca/">http://www.circos.ca/</a>                                                                                                                                                                       |
| ChIPseeker                        | Yu, G. et al., 2015 <sup>12</sup>                                                           | <a href="https://bioconductor.org/packages/release/bioc/html/ChIPseeker.html">https://bioconductor.org/packages/release/bioc/html/ChIPseeker.html</a>                                                                           |
| ClusterProfiler                   | Yu, G. et al., 2012 <sup>13</sup>                                                           | <a href="http://www.bioconductor.org/packages/release/bioc/html/clusterProfiler.html">http://www.bioconductor.org/packages/release/bioc/html/clusterProfiler.html</a>                                                           |
| IGV (Integrative Genomics Viewer) | Robinson, J. T. et al., 2011 <sup>14</sup> , Thorvaldsdottir, H. et al., 2013 <sup>15</sup> | <a href="http://www.igv.org/">http://www.igv.org/</a>                                                                                                                                                                           |
| TxDb.Hsapiens.UCSC.hg38.knownGene | Bioconductor core team and Bioconductor package maintainer, 2019                            | <a href="http://www.bioconductor.org/packages/release/data/annotation/html/TxDb.Hsapiens.UCSC.hg38.knownGene.html">http://www.bioconductor.org/packages/release/data/annotation/html/TxDb.Hsapiens.UCSC.hg38.knownGene.html</a> |
| Gviz                              | Hahne, F. & Ivanek, R., 2016 <sup>16</sup>                                                  | <a href="http://bioconductor.org/packages/release/bioc/html/Gviz.html">http://bioconductor.org/packages/release/bioc/html/Gviz.html</a>                                                                                         |
| ggpubr                            | A. Kassambara., 2016                                                                        | <a href="https://cran.r-project.org/web/packages/ggpubr/index.html">https://cran.r-project.org/web/packages/ggpubr/index.html</a>                                                                                               |
| ggplot2                           | Ginestet, C., 2011 <sup>17</sup>                                                            | <a href="https://cran.r-project.org/web/packages/ggplot2/index.html">https://cran.r-project.org/web/packages/ggplot2/index.html</a>                                                                                             |
| Stats                             | R Core Team, 2019                                                                           | <a href="https://www.R-project.org/">https://www.R-project.org/</a>                                                                                                                                                             |
| DOSE                              | Yu, G. et al., 2015 <sup>18</sup>                                                           | <a href="http://www.bioconductor.org/packages/release/bioc/html/DOSE.html">http://www.bioconductor.org/packages/release/bioc/html/DOSE.html</a>                                                                                 |
| Org.Hs.eg.db                      | Marc Carlson, 2019                                                                          | <a href="http://www.bioconductor.org/pack">http://www.bioconductor.org/pack</a>                                                                                                                                                 |

|            |                                           |                                                                                                               |
|------------|-------------------------------------------|---------------------------------------------------------------------------------------------------------------|
|            |                                           | ages/release/data/annotation/html/org.Hs.eg.db.html                                                           |
| Remap      | Remap Development Team from NCBI          | <a href="https://www.ncbi.nlm.nih.gov/genome/tools/remap">https://www.ncbi.nlm.nih.gov/genome/tools/remap</a> |
| SPADE      | Mori, H. et al., 2019 <sup>19</sup>       | <a href="https://github.com/yachielab/SPADE">https://github.com/yachielab/SPADE</a>                           |
| BWA        | H. Li, 2013                               | <a href="http://bio-bwa.sourceforge.net/index.shtml">http://bio-bwa.sourceforge.net/index.shtml</a>           |
| Segment.pl | Paulsen, M. T. et al., 2014 <sup>20</sup> | <a href="http://sourceforge.net/projects/segment-stream/">http://sourceforge.net/projects/segment-stream/</a> |

### Supplementary reference

- 1 Langmead, B. & Salzberg, S. L. Fast gapped-read alignment with Bowtie 2. *Nat Methods* **9**, 357-359, doi:10.1038/nmeth.1923 (2012).
- 2 Kim, D., Langmead, B. & Salzberg, S. L. HISAT: a fast spliced aligner with low memory requirements. *Nat Methods* **12**, 357-360, doi:10.1038/nmeth.3317 (2015).
- 3 Liao, Y., Smyth, G. K. & Shi, W. featureCounts: an efficient general purpose program for assigning sequence reads to genomic features. *Bioinformatics* **30**, 923-930, doi:10.1093/bioinformatics/btt656 (2014).
- 4 Heinz, S. *et al.* Simple combinations of lineage-determining transcription factors prime cis-regulatory elements required for macrophage and B cell identities. *Mol Cell* **38**, 576-589, doi:10.1016/j.molcel.2010.05.004 (2010).
- 5 Li, H. *et al.* The Sequence Alignment/Map format and SAMtools. *Bioinformatics* **25**, 2078-2079, doi:10.1093/bioinformatics/btp352 (2009).
- 6 Quinlan, A. R. & Hall, I. M. BEDTools: a flexible suite of utilities for comparing genomic features. *Bioinformatics* **26**, 841-842, doi:10.1093/bioinformatics/btq033 (2010).
- 7 Ramirez, F. *et al.* deepTools2: a next generation web server for deep-

- sequencing data analysis. *Nucleic Acids Res* **44**, W160-165, doi:10.1093/nar/gkw257 (2016).
- 8 Zang, C. *et al.* A clustering approach for identification of enriched domains from histone modification ChIP-Seq data. *Bioinformatics* **25**, 1952-1958, doi:10.1093/bioinformatics/btp340 (2009).
- 9 McKenna, A. *et al.* The Genome Analysis Toolkit: a MapReduce framework for analyzing next-generation DNA sequencing data. *Genome Res* **20**, 1297-1303, doi:10.1101/gr.107524.110 (2010).
- 10 Boeva, V. *et al.* Control-FREEC: a tool for assessing copy number and allelic content using next-generation sequencing data. *Bioinformatics* **28**, 423-425, doi:10.1093/bioinformatics/btr670 (2012).
- 11 Krzywinski, M. *et al.* Circos: an information aesthetic for comparative genomics. *Genome Res* **19**, 1639-1645, doi:10.1101/gr.092759.109 (2009).
- 12 Yu, G., Wang, L. G. & He, Q. Y. ChIPseeker: an R/Bioconductor package for ChIP peak annotation, comparison and visualization. *Bioinformatics* **31**, 2382-2383, doi:10.1093/bioinformatics/btv145 (2015).
- 13 Yu, G., Wang, L. G., Han, Y. & He, Q. Y. clusterProfiler: an R package for comparing biological themes among gene clusters. *Omics : a journal of integrative biology* **16**, 284-287, doi:10.1089/omi.2011.0118 (2012).
- 14 Robinson, J. T. *et al.* Integrative genomics viewer. *Nat Biotechnol* **29**, 24-26, doi:10.1038/nbt.1754 (2011).
- 15 Thorvaldsdottir, H., Robinson, J. T. & Mesirov, J. P. Integrative Genomics Viewer (IGV): high-performance genomics data visualization and exploration. *Brief Bioinform* **14**, 178-192, doi:10.1093/bib/bbs017 (2013).
- 16 Hahne, F. & Ivanek, R. Visualizing Genomic Data Using Gviz and Bioconductor. *Methods in molecular biology (Clifton, N.J.)* **1418**, 335-351, doi:10.1007/978-1-4939-3578-9\_16 (2016).
- 17 Ginestet, C. ggplot2: Elegant Graphics for Data Analysis. *J R Stat Soc a*

- Stat* **174**, 245-245, doi:DOI 10.1111/j.1467-985X.2010.00676\_9.x (2011).
- 18 Yu, G., Wang, L. G., Yan, G. R. & He, Q. Y. DOSE: an R/Bioconductor package for disease ontology semantic and enrichment analysis. *Bioinformatics* **31**, 608-609, doi:10.1093/bioinformatics/btu684 (2015).
- 19 Mori, H., Evans-Yamamoto, D., Ishiguro, S., Tomita, M. & Yachie, N. Fast and global detection of periodic sequence repeats in large genomic resources. *Nucleic Acids Research* **47**, doi:ARTN e8 10.1093/nar/gky890 (2019).
- 20 Paulsen, M. T. *et al.* Use of Bru-Seq and BruChase-Seq for genome-wide assessment of the synthesis and stability of RNA. *Methods* **67**, 45-54, doi:10.1016/j.ymeth.2013.08.015 (2014).
